# Supplementary material for: Efficient synthesis of epoxybutane from butanediol via a two-step process
Source: Royal Society of Chemistry journal article supplement (doi:10.1039/c9ra01220f), 2019-01-01
Supplement: c9ra01220f1.pdf [file c9ra01220f1.pdf]

## Efficient synthesis of epoxybutane from butanediol via a two-step process

Xin Niu,<sup>ab</sup> Ligu Wang,<sup>\*bcd</sup> Junya Cao,<sup>a</sup> Yan Cao,<sup>b</sup> Peng He,<sup>b</sup> Junya Zhou<sup>ab</sup> and Huiquan Li<sup>\*bc</sup>

<sup>a</sup>*China University of Mining & Technology, Beijing, Beijing, 100083, (P.R.China)*

<sup>b</sup>*CAS Key Laboratory of Green Process and Engineering, National Engineering Laboratory for Hydrometallurgical Cleaner Production Technology, Institute of Process Engineering, Chinese Academy of Sciences, Beijing, 100190, (P.R.China).*

<sup>c</sup>*Sino-Danish College University, Chinese Academy of Sciences. Beijing, 100049, (P.R.China)*

<sup>d</sup>*Dalian National Laboratory for Clean Energy, Dalian, 116023, China*

*\*Email: lgwang@ipe.ac.cn; hqli@ipe.ac.cn*

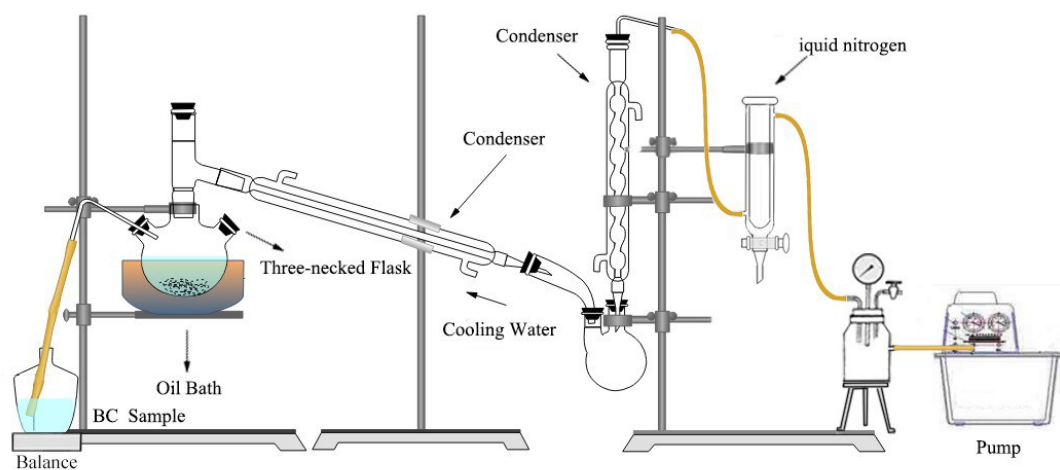

Figure S1 The device for the continuous decarboxylation process.

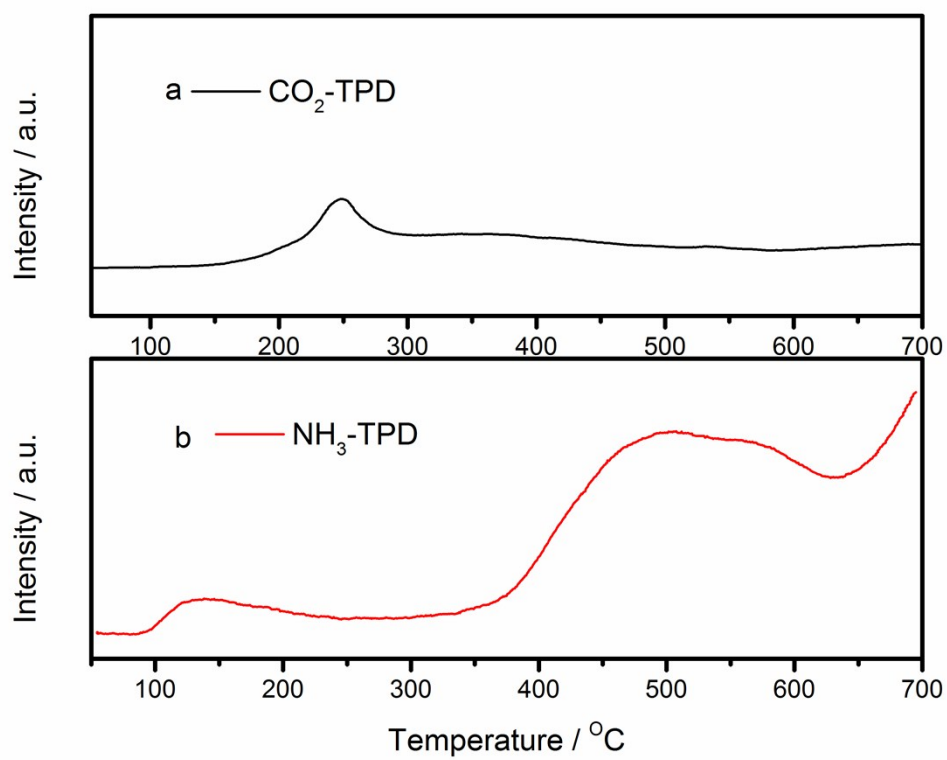

Figure S2 (a) CO<sub>2</sub>-TPD, (b) NH<sub>3</sub>-TPD of the NaAlO<sub>2</sub>

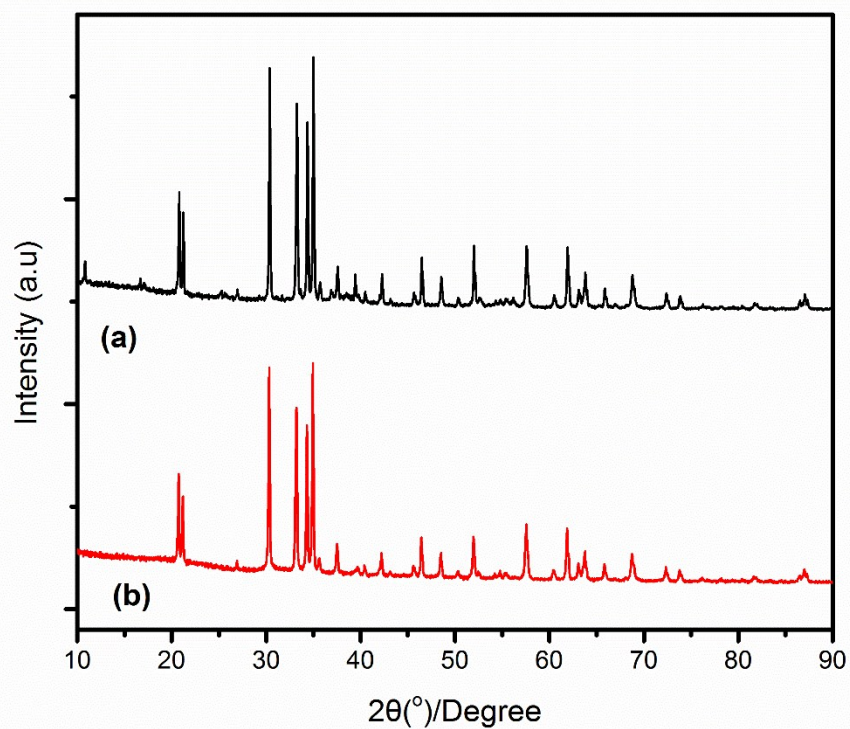

Figure S3 XRD patterns obtained for  $\text{NaAlO}_2$ : (a) fresh  $\text{NaAlO}_2$ , (b) used  $\text{NaAlO}_2$ .

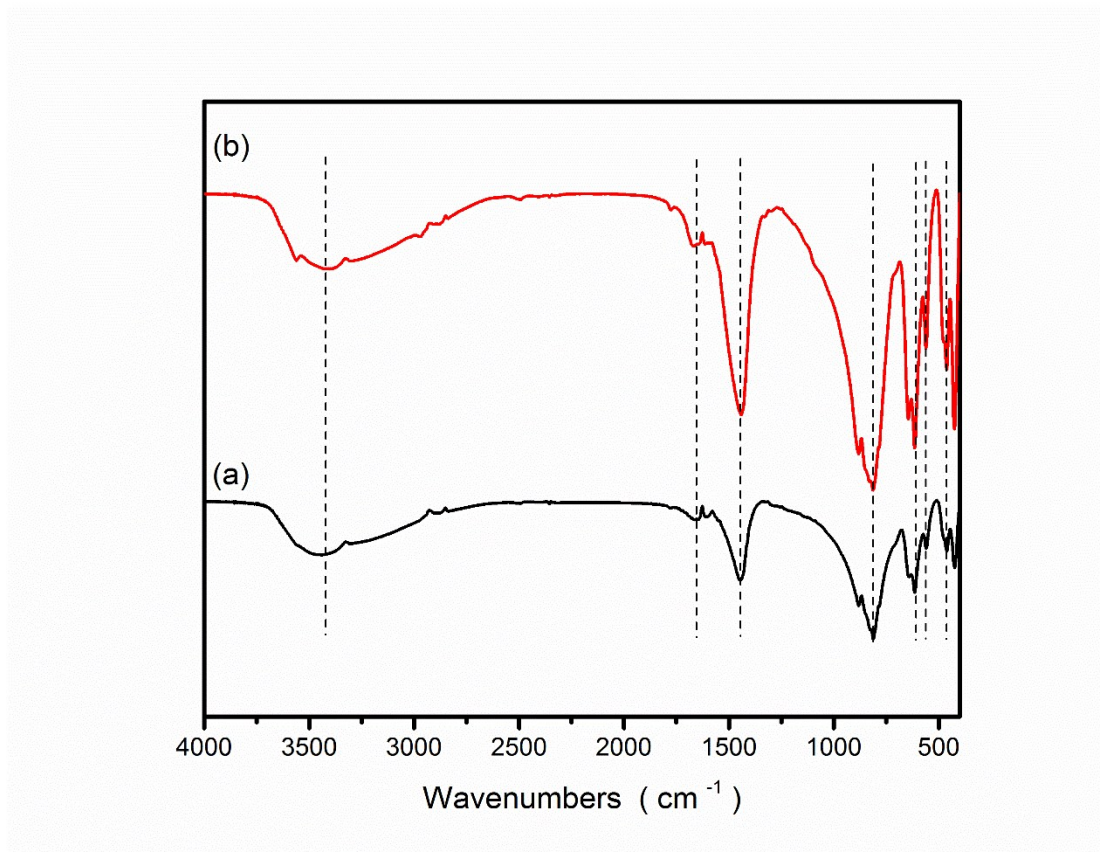

Figure S4 FTIR spectra obtained for  $\text{NaAlO}_2$ : (a) Fresh  $\text{NaAlO}_2$ , (b) recovered  $\text{NaAlO}_2$ .

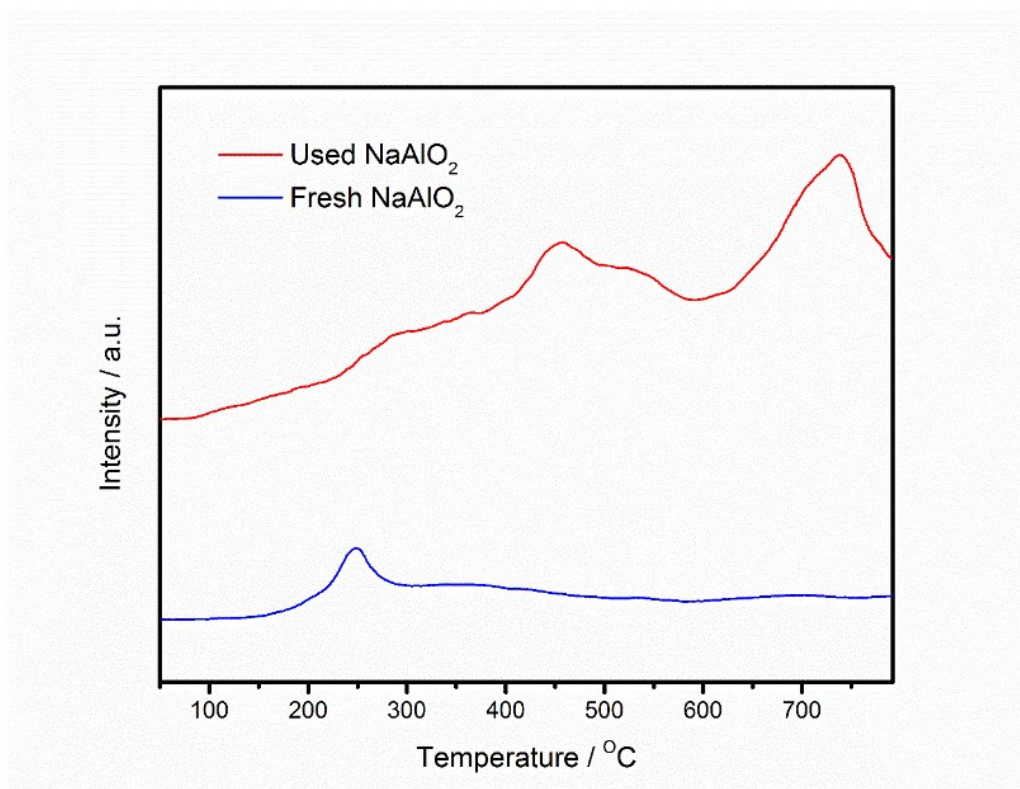

Figure S5 CO<sub>2</sub> -TPD of the NaAlO<sub>2</sub> (both before and after reaction)

Table S1 The BET of the NaAlO<sub>2</sub> (both before and after reaction)

| Catalyst                 | BET surface area (m <sup>2</sup> g <sup>-1</sup> ) |
|--------------------------|----------------------------------------------------|
| fresh NaAlO <sub>2</sub> | 1.7                                                |
| used NaAlO <sub>2</sub>  | 13.6                                               |

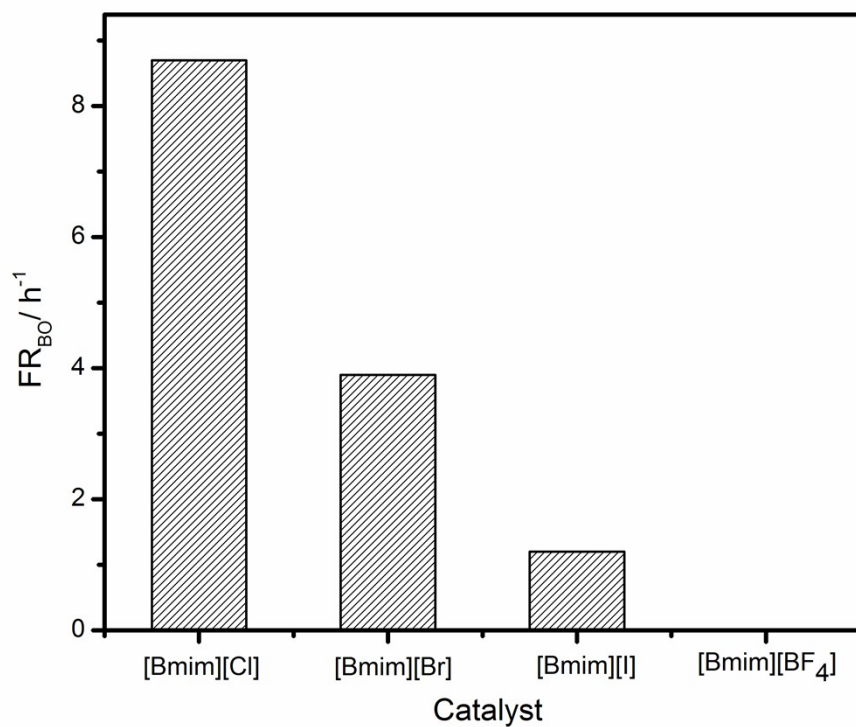

Figure S6. Effect of the catalyst type on the  $FR_{BO}$  of the decarboxylation of butenyl carbonate. (Reaction conditions: BC: 40g; catalyst:2g; temperature: 185 °C; reaction time: 2h; vacuum degree: 0.005 MPa.)

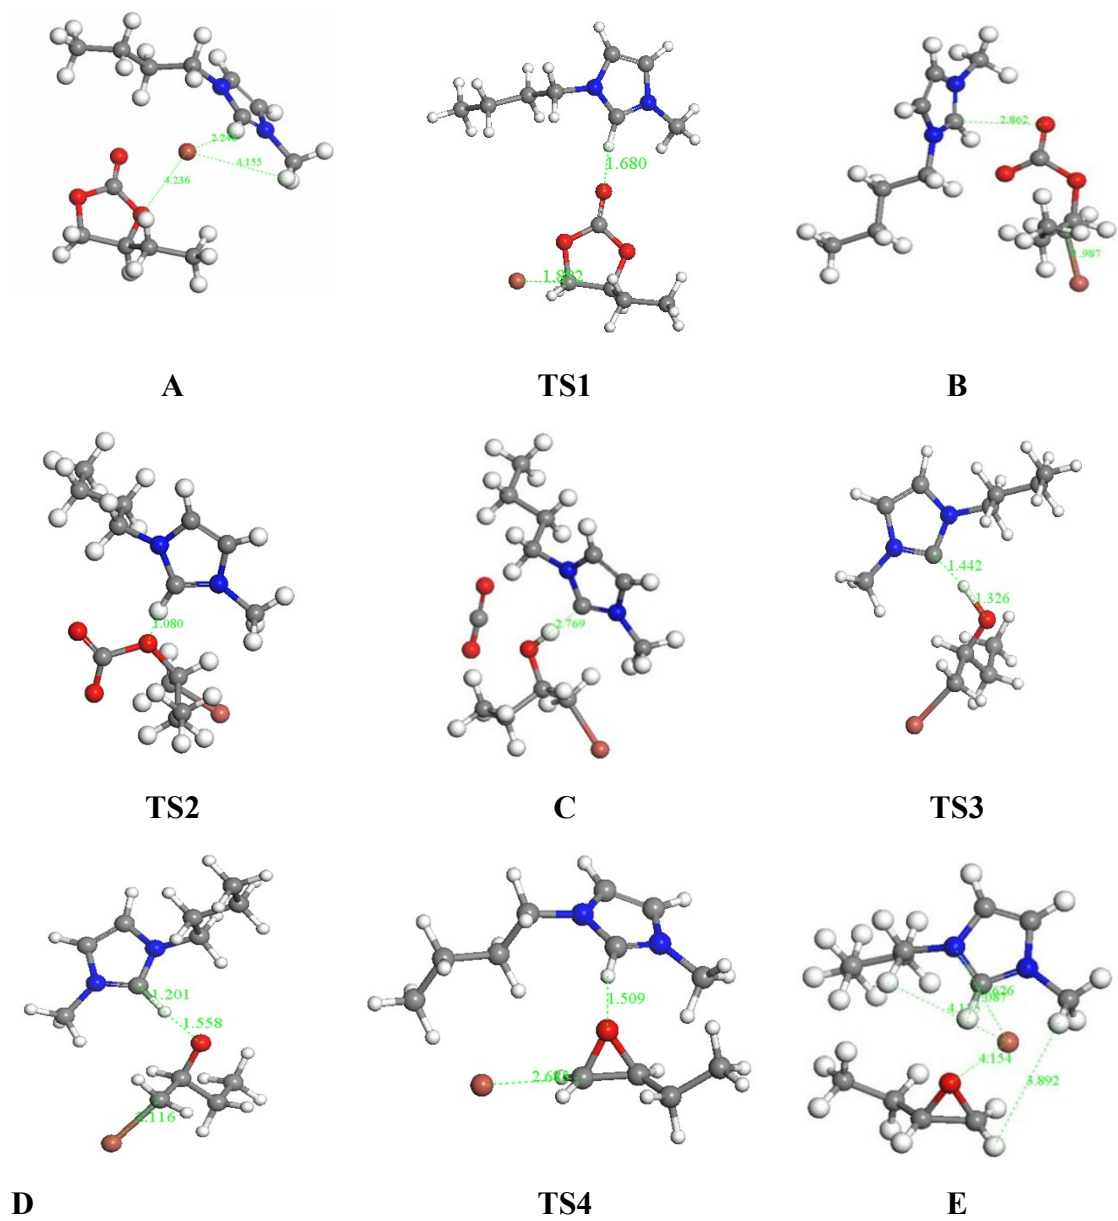

Figure S7 Reaction pathways to produce BO



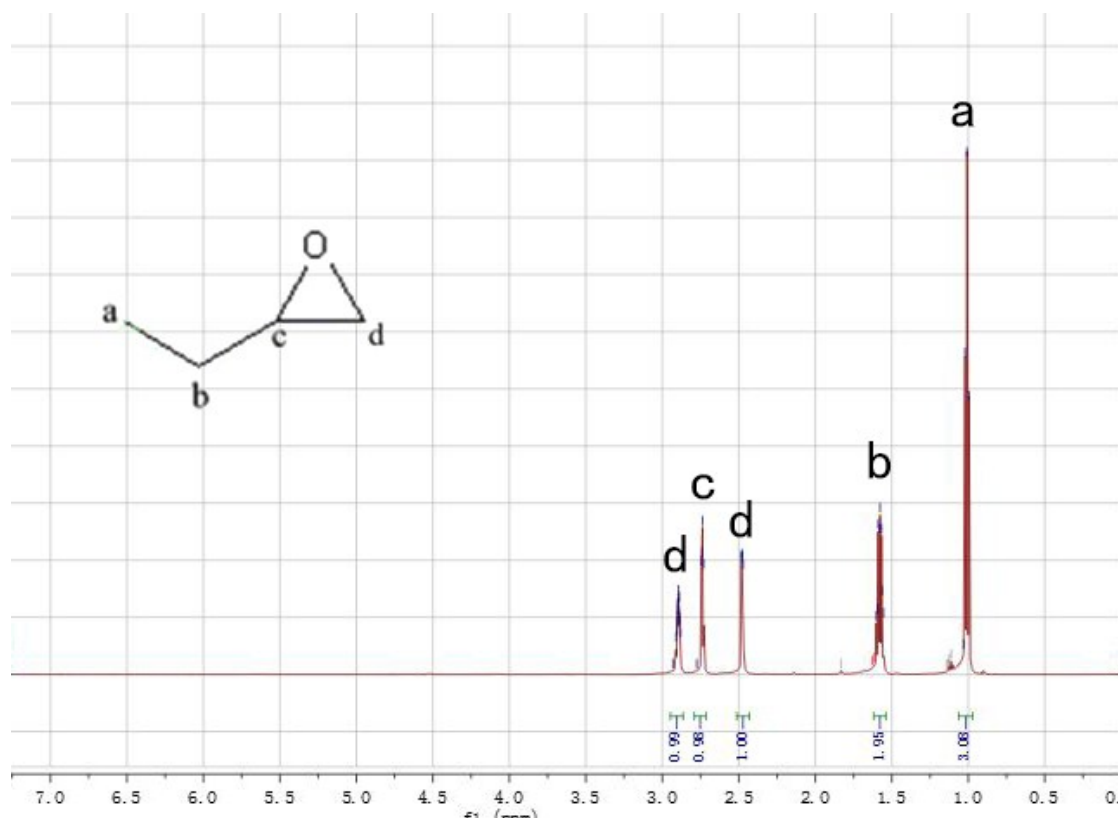

Figure S8  $^1\text{H-NMR}$  spectrum of the BO produced during the decarboxylation reaction.

The structure of BO produced from the consecutive carbonylation and decarboxylation was also determined by  $^1\text{H-NMR}$  analysis. As illustrated in Figure S2. There are five characteristic peaks corresponding to different protons in these spectra. The signals at 1.02 ppm was attributed to the methyl protons of BO ( $\text{CH}_3$ );  $\delta$  1.58 ppm was ascribed to the methylene protons of BO ( $\text{CH}_2$ );  $\delta$  2.74 ppm is attributed to the methyne proton of BO ( $\text{CH}$ ); the two singlets at 2.48 and 2.89 ppm are attributed to the protons of BO. The  $^1\text{H-NMR}$  results further verified that there are no other impurities in BO. Above all, in this work, the decarboxylation of BC was successfully conducted and remarkable results were achieved over  $[\text{Bmim}][\text{Br}]$  catalyst.
